# Supplementary material
Source: Springer Nature journal article supplement (https://www.springermedizin.de/resource/supplementary/12875_2010_563_MOESM4_ESM.pdf/9434950)

Was providing you with the information sheet a useful thing to do?

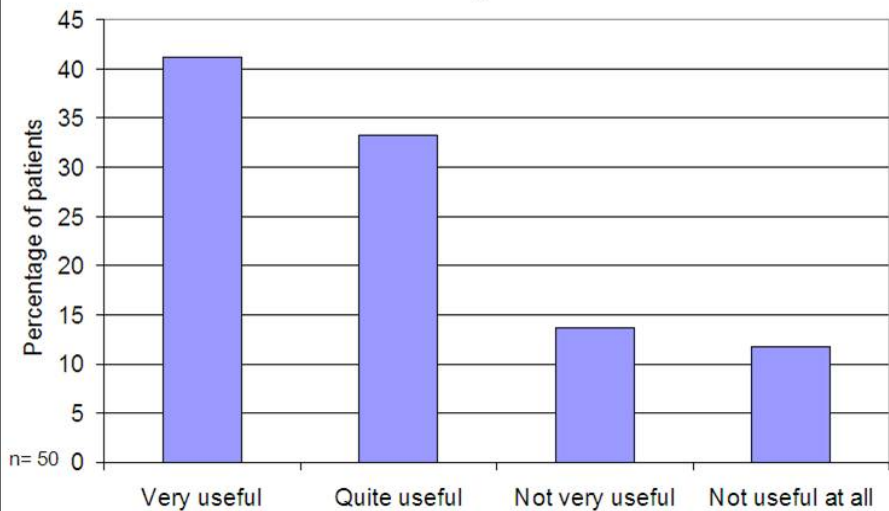

Supplement: MOESM4 [file 9434950]
